# Supplementary material for: What challenges hamper Kenyan family physicians in pursuing their family medicine mandate? A qualitative study among family physicians and their colleagues
Source: PubMed Central journal article supplement (PMC3418556; doi:10.1186/1471-2296-13-32), 2012-04-26
Supplement: 1471-2296-13-32-S2.pdf [file 1471-2296-13-32-S2.pdf]

## Questionnaire for semi-structured FGDs with direct colleagues

How is it going in the hospital?

What is family medicine?

What is the role of a family physician?

How differs family medicine from other specialisms?

What do you expect from a family physician?

Does the family physician fulfil your expectations?
